# Supplementary material for: The Development of Alginate/Ag NPs/Caffeic Acid Composite Membranes as Adsorbents for Water Purification
Source: MDPI journal article supplement (doi:10.3390/membranes13060591), 2023-06-09
Supplement: s1 [file s1]

## Article

# The development of alginate/Ag NPs/caffeic acid composite membranes as adsorbents for water purification

Angela Spoială <sup>1,2</sup>, Cornelia-Ioana Ilie <sup>1,2</sup>, Georgiana Dolete <sup>1,2</sup>, Gabriela Petrișor <sup>1,2</sup>, Roxana-Doina Trușcă <sup>1,2</sup>, Ludmila Motelica <sup>2,3</sup>, Denisa Ficai <sup>2,3</sup>, Anton Ficai <sup>1,2,4</sup>, Ovidiu-Cristian Oprea <sup>2,3,4\*</sup>, Mara-Lia Dițu<sup>5</sup>

<sup>1</sup> Department of Science and Engineering of Oxide Materials and Nanomaterials, Faculty of Chemical Engineering and Biotechnologies, University Politehnica of Bucharest, 1-7 Gh Polizu Street, 011061 Bucharest, Romania; angela.8317@gmail.com (A.S.)

<sup>2</sup> National Centre for Micro and Nanomaterials & National Centre for Food Safety, Faculty of Chemical Engineering and Biotechnologies, University Politehnica of Bucharest, Spl. Independentei 313, 060042 Bucharest, Romania.

<sup>3</sup> Department of Inorganic Chemistry, Physical Chemistry and Electrochemistry, Faculty of Chemical Engineering and Biotechnologies, University Politehnica of Bucharest, 1-7 Gh Polizu Street, 050054 Bucharest, Romania.

<sup>4</sup> Academy of Romanian Scientists, 3 Ilfov Street, 050045 Bucharest, Romania.

<sup>5</sup> Faculty of Biology, University of Bucharest, 1-3 Aleea Portocalelor, 060101 Bucharest, Romania.

\* Correspondence: ovidiu.oprea@upb.ro

**Citation:** Spoială, A.; Ilie, C-I.; Dolete, G.; Petri, G.; Tru, R-D.; Motelica, L.; Ficai, D.; Ficai, A.; Oprea, O-C.; Di, M-L. The development of alginate/Ag NPs/caffeic acid composite membranes as adsorbents for water purification. *Membranes* **2023**, *13*, 591. <https://doi.org/10.3390/membranes13060591>

Academic Editors: Smolik Jerzy, Piotr Wieciński and Joanna Kacprzyńska-Golacka

Received: 28 March 2023

Revised: 28 May 2023

Accepted: 5 June 2023

Published: 9 June 2023

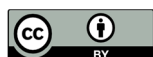

**Copyright:** © 2023 by the authors. Licensee MDPI, Basel, Switzerland. This article is an open access article distributed under the terms and conditions of the Creative Commons Attribution (CC BY) license (<https://creativecommons.org/licenses/by/4.0/>).

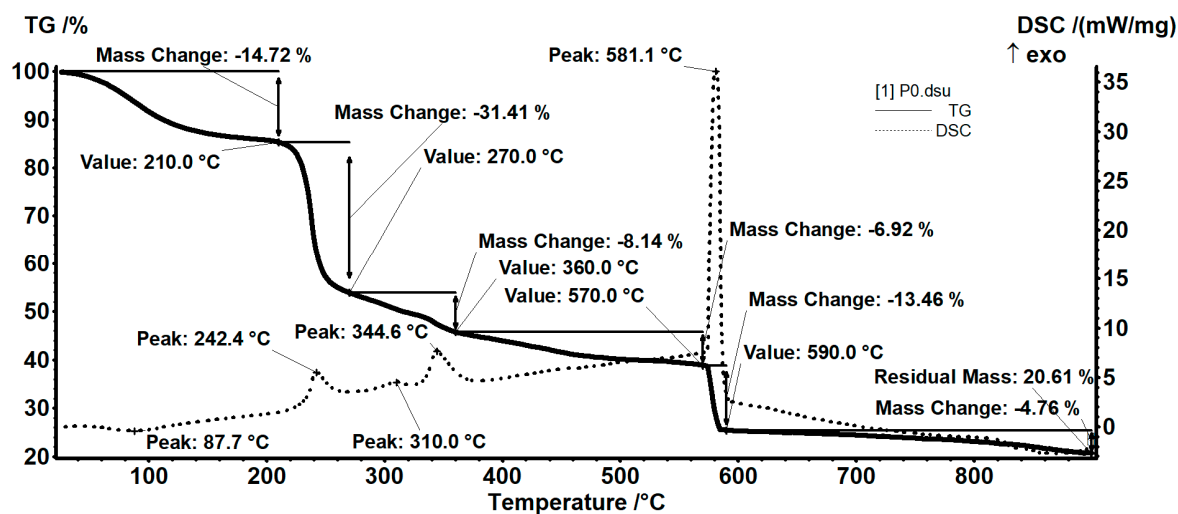

Figure S1. TG-DSC curves of P0 alginate membrane

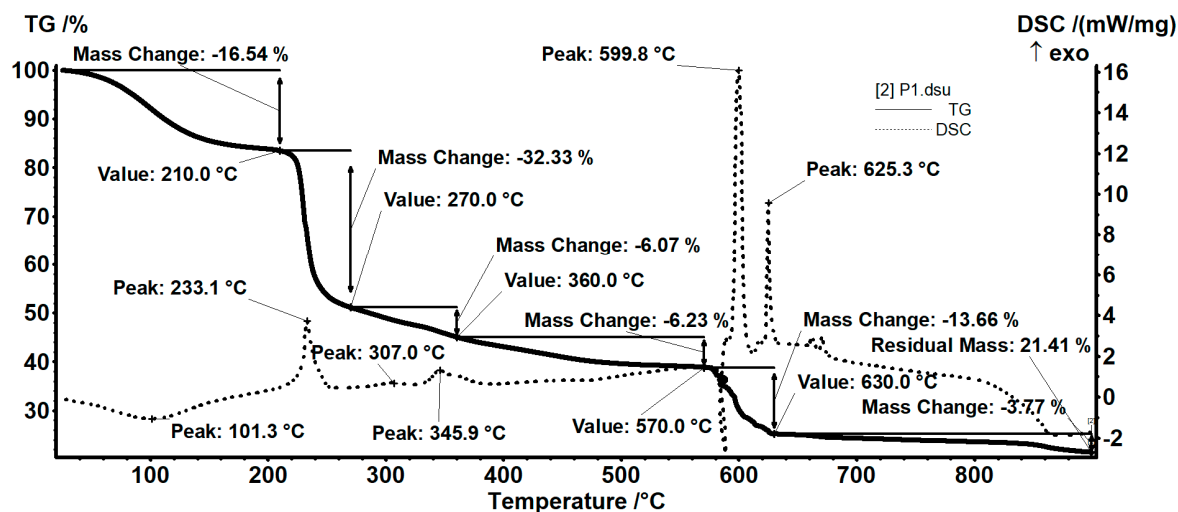

Figure S2. TG-DSC curves of P1 alginate-based composite membrane

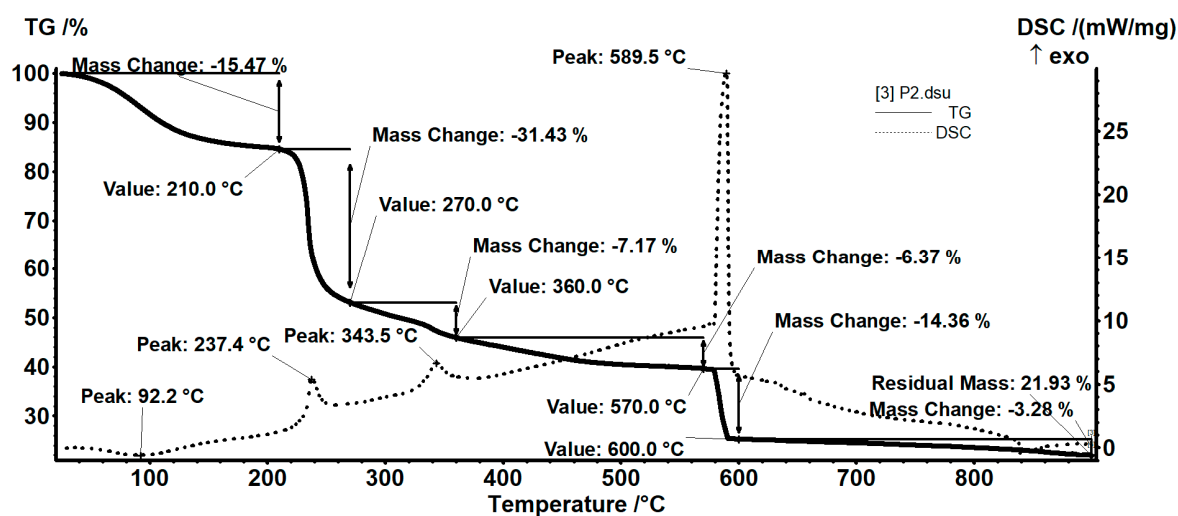

Figure S3. TG-DSC curves of P2 alginate-based composite membrane

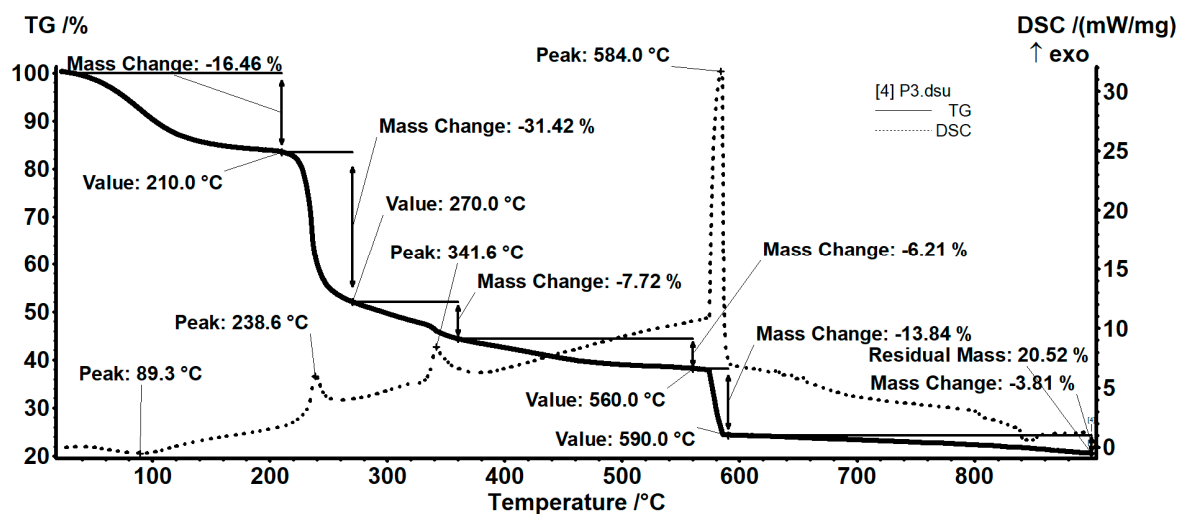

Figure S4. TG-DSC curves of P3 alginate-based composite membrane

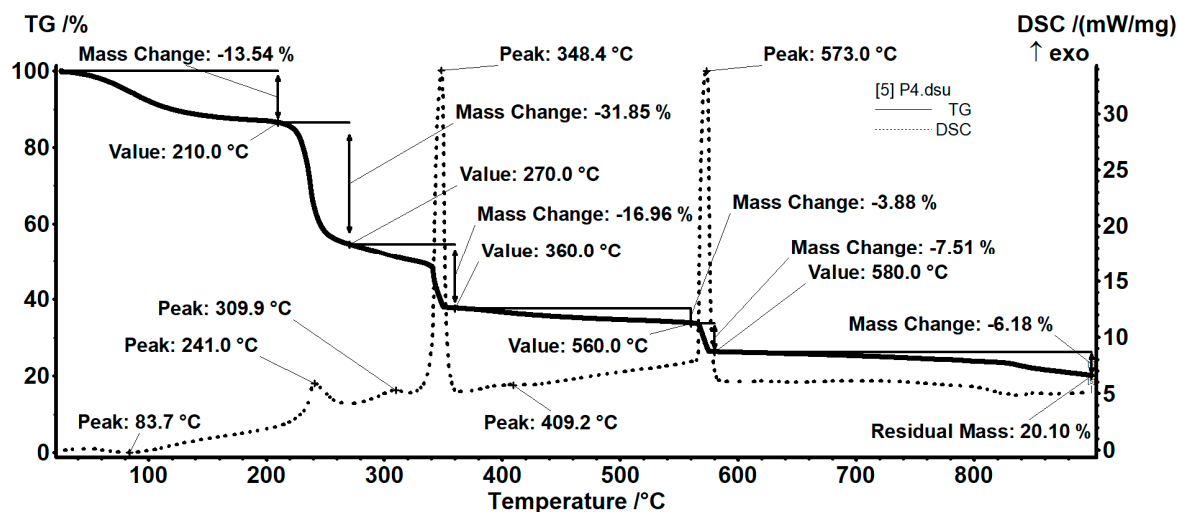

Figure S5. TG-DSC curves of P4 alginate-based composite membrane

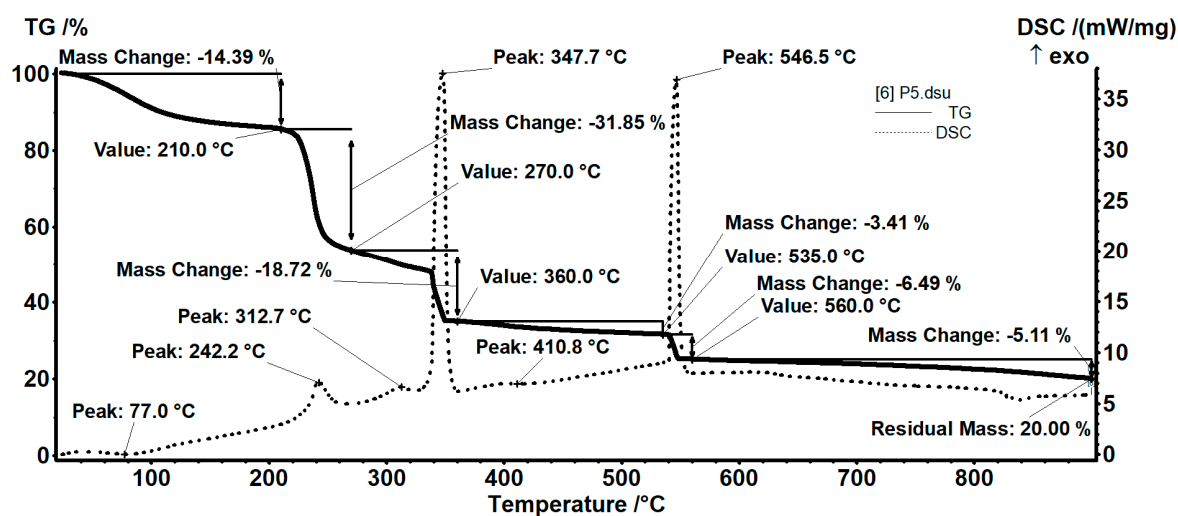

Figure S6. TG-DSC curves of P5 alginate-based composite membrane

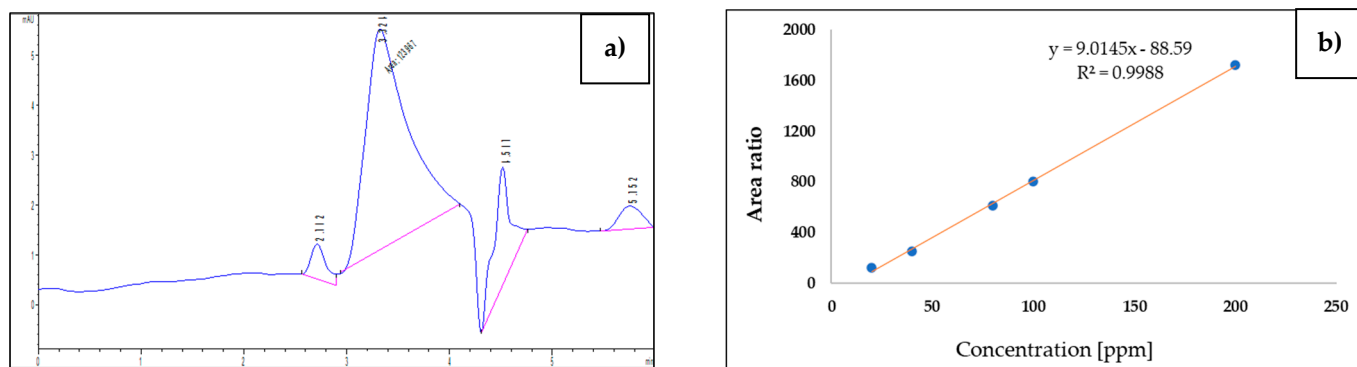

**Figure S7.** HPLC chromatogram of caffeic acid standards (a) and calibration curve (b)

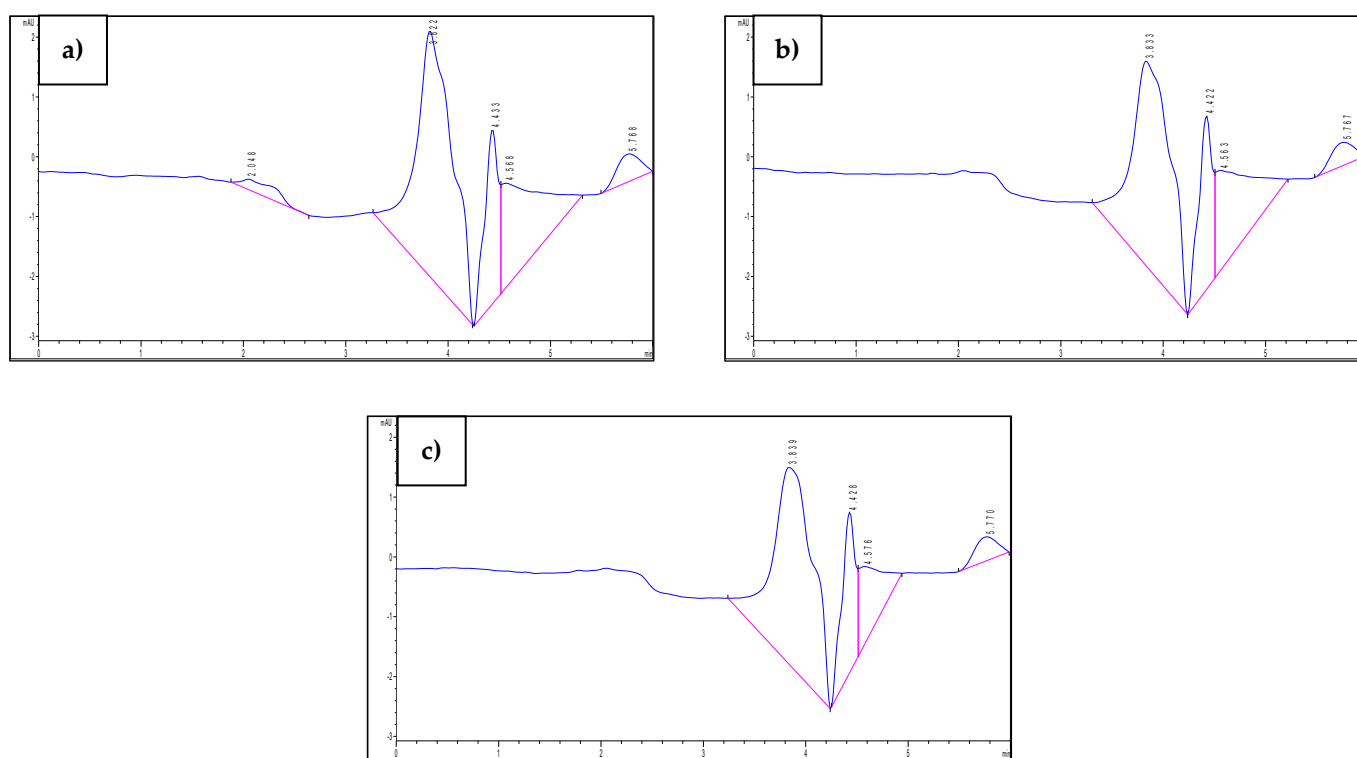

**Figure S8.** HPLC chromatograms for samples collected after 137h: a) P3; b) P4; c) P5.

**Disclaimer/Publisher's Note:** The statements, opinions and data contained in all publications are solely those of the individual author(s) and contributor(s) and not of MDPI and/or the editor(s). MDPI and/or the editor(s) disclaim responsibility for any injury to people or property resulting from any ideas, methods, instructions or products referred to in the content.
